# Supplementary material for: A new look at the jet-storm track relationship in the North Pacific and North Atlantic
Source: Copernicus journal article supplement (doi:10.5194/egusphere-2025-3605), 2025-08-11
Supplement: Supplementary file 1 [file egusphere-2025-3605-supplement.pdf]

Supplementary material for

## **A new look at the jet-storm track relationship in the North Pacific and North Atlantic**

by Nora Zilibotti <sup>a</sup>, Heini Wernli <sup>a</sup>, and Sebastian Schemm <sup>b</sup>

<sup>a</sup>Institute for Atmospheric and Climate Science, ETH Zürich, Switzerland

<sup>b</sup>Department of Applied Mathematics and Theoretical Physics, University of Cambridge, Cambridge, UK

Corresponding author: Nora Zilibotti, [nora.zilibotti@env.ethz.ch](mailto:nora.zilibotti@env.ethz.ch)

This file contains supplementary Figs. 1 - 7.

# 1 Supplement

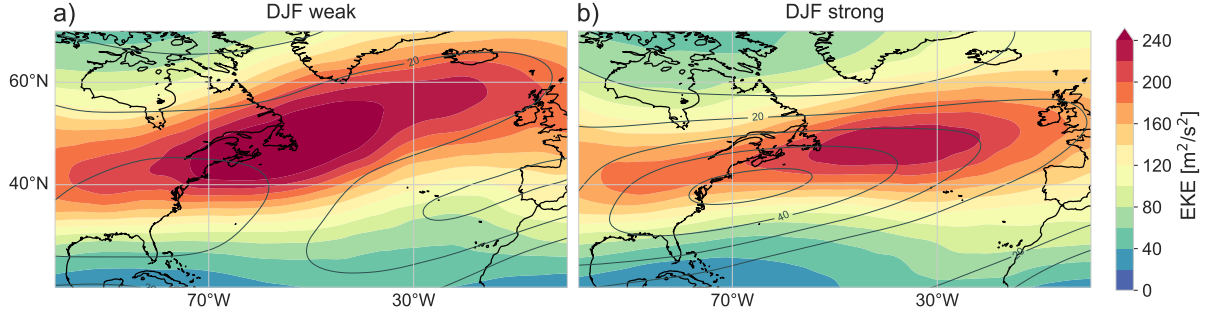

Figure S1: EKE at 300 hPa (shading) and 10-d low-pass filtered zonal wind at 250 hPa ( $U$ , gray contours, every  $10 \text{ m s}^{-1}$ ) in the NA for weak (a) and strong (b) jet timesteps.

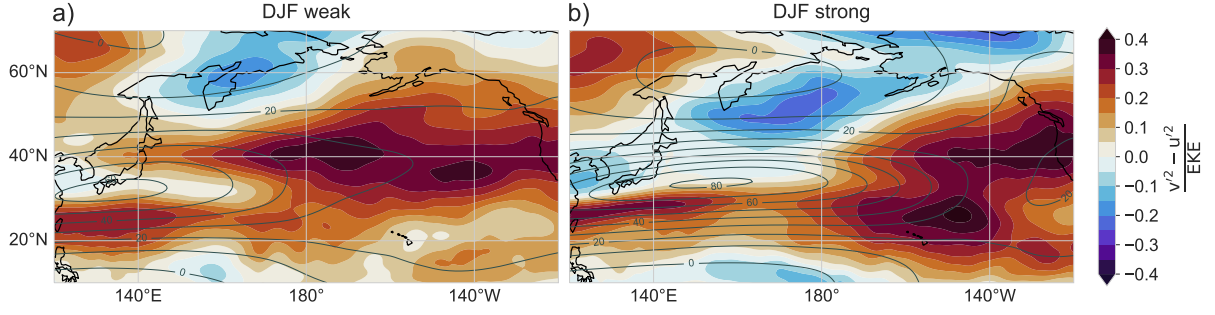

Figure S2: Eddy orientation measure,  $v'^2 - u'^2$  normalized by EKE (shading) and the 10-d low-pass filtered zonal wind on 250 hPa ( $U$ , gray contours) for weak (a) and strong (b) jet timesteps in the NP.

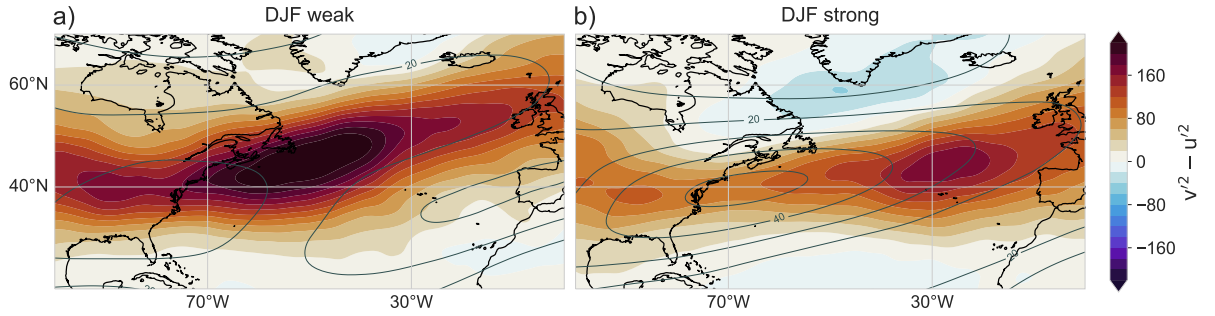

Figure S3: Unnormalized eddy orientation measure,  $v'^2 - u'^2$  (shading) and the 10-d low-pass filtered zonal wind on 250 hPa ( $U$ , gray contours) for weak (a) and strong (b) jet timesteps in the NA

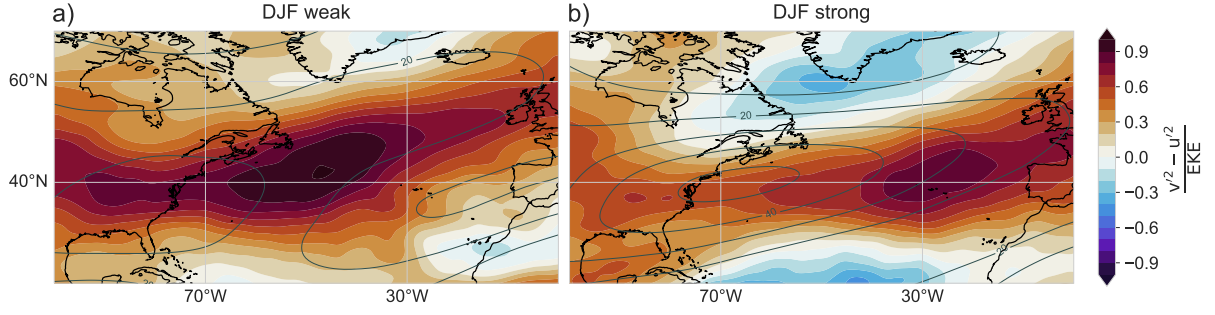

Figure S4: As Fig. S2 but for the NA.

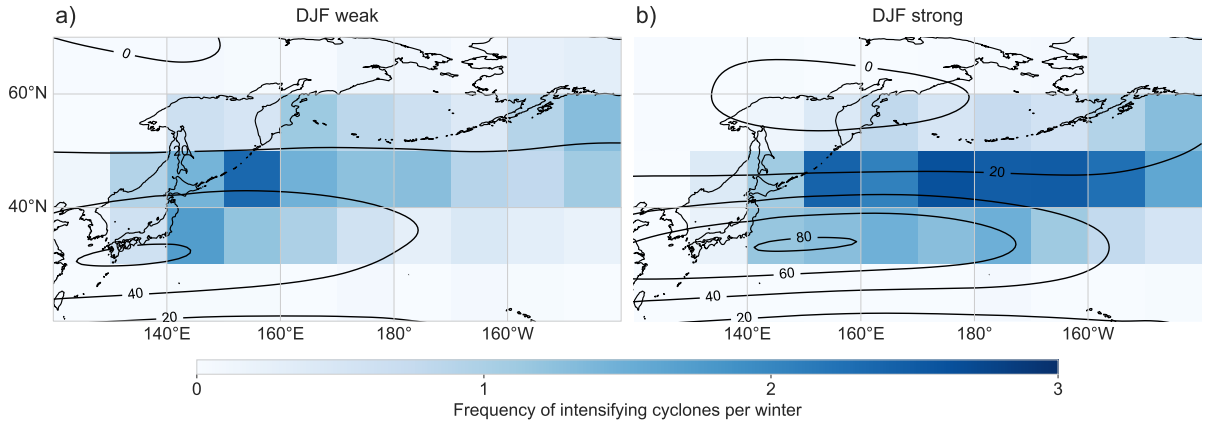

Figure S5: 10-day low-pass filtered zonal wind at 250 hPa ( $U$ ) and area-weighted annual frequency of cyclones at their time of maximum 12-hourly intensification in the NP. Frequencies are computed separately for time steps belonging to the weakest (left) and strongest (right) tercile of  $U$ .

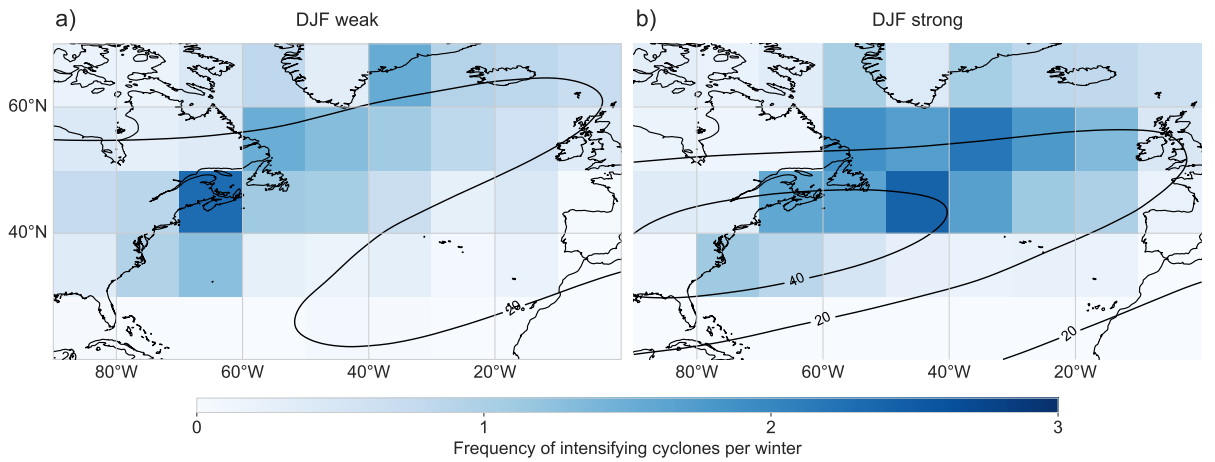

Figure S6: As Fig. S5 but for the NA.

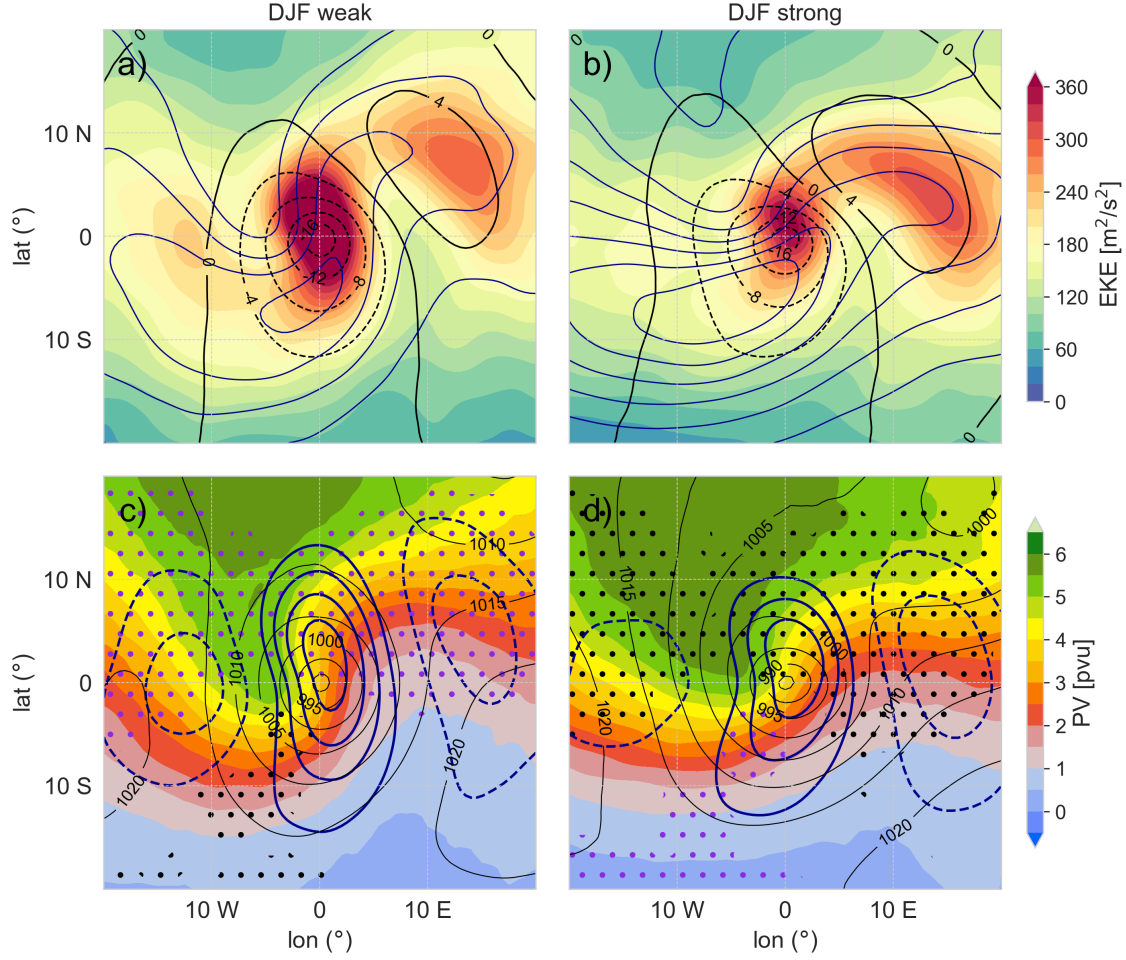

Figure S7: Cyclone-centered composites of cyclones at their time step of maximal 12-h intensification in the NA domain. Shown are cyclones with maximal intensification during time steps belonging to the weak (**a,c**) and strong  $U$  (**b,d**) terciles. (a,b) show the 300 hPa EKE in shading, the high-pass filtered SLP in black contours (every 4 hPa) and the total kinetic energy at 250 hPa in blue contours (every  $200 \text{ m}^2 \text{ s}^{-2}$ ). The innermost total kinetic energy contour is  $1400 \text{ m}^2 \text{ s}^{-2}$  in (a) and  $2200 \text{ m}^2 \text{ s}^{-2}$  in (b). (c,d) show PV on 320 K in shading, SLP in black contours (every 5 hPa), and the high-pass filtered meridional wind at 300 hPa in blue contours (every  $5 \text{ m s}^{-1}$ ). The significance of a positive (negative) PV anomaly with respect to the PV distribution of all DJF cyclones on a 1% level is shown by black (violet) stippling.
